# Supplementary material for: Long-term outcomes after Natural Orifice Specimen Extraction versus conventional laparoscopy-assisted surgery for rectal cancer: a matched case-control study
Source: PubMed Central journal article supplement — Ann Surg Treat Res. 2017 Dec 28;94(1):26–35. doi: 10.4174/astr.2018.94.1.26 (PMC5765275; doi:10.4174/astr.2018.94.1.26), 2017-12-28
Supplement: astr-94-26-s001.pdf [file astr-94-26-s001.pdf]

## SUPPLEMENTARY MATERIAL

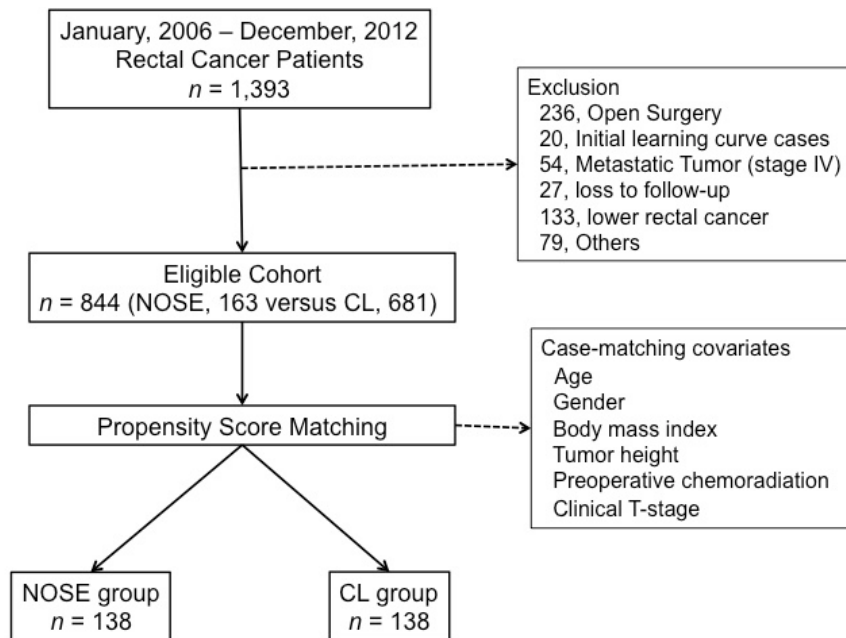

**Supplementary Fig. 1.** Patient flowchart. NOSE, Natural Orifice Specimen Extraction; CL, conventional laparoscopy-assisted surgery.
